# Supplementary material for: Principles of proteome allocation are revealed using proteomic data and genome-scale models
Source: Springer Nature journal article supplement (doi:10.1038/srep36734), 2016-11-18
Supplement: 41598_2016_BFsrep36734_MOESM1_ESM.pdf [file 41598_2016_BFsrep36734_MOESM1_ESM.pdf]

# Supplementary Material for “Principles of proteome allocation are revealed using proteomic data and genome-scale models”

*Laurence Yang<sup>1,5</sup>, James T. Yurkovich<sup>1,2,5</sup>, Colton J. Lloyd<sup>1</sup>, Ali Ebrahim<sup>1</sup>, Michael A. Saunders<sup>3</sup>, Bernhard O. Palsson<sup>1,4</sup>*

*<sup>1</sup>Department of Bioengineering, University of California, San Diego, La Jolla, California, USA. <sup>2</sup>Bioinformatics and Systems Biology Program, University of California, San Diego, La Jolla, California, USA. <sup>3</sup>Department of Management Science and Engineering, Stanford University, Stanford, California, USA. <sup>4</sup>Novo Nordisk Foundation Center for Biosustainability, The Technical University of Denmark, 2970 Hørsholm, Denmark. <sup>5</sup>These authors contributed equally to this work.*

*email: palsson@ucsd.edu*

## Supplementary Tables

**Table S1:** Enrichment test of sectors for sigma factors. Ratio-sector denotes the number of overlapping genes relative to the sector, while ratio- $\sigma$  is the number of overlapping genes relative to the genes controlled by the sigma factor.

| Sector                                                       | $\sigma$ factor | $p$ -value | Ratio-sector | Ratio- $\sigma$ |
|--------------------------------------------------------------|-----------------|------------|--------------|-----------------|
| Amino acid transport and metabolism                          | D               | 3.475E-01  | 9.479E-01    | 6.798E-02       |
| Amino acid transport and metabolism                          | S               | 6.656E-01  | 6.351E-01    | 6.617E-02       |
| Amino acid transport and metabolism                          | H               | 9.051E-02  | 2.654E-01    | 7.921E-02       |
| Amino acid transport and metabolism                          | N               | 2.457E-02  | 1.754E-01    | 9.227E-02       |
| Amino acid transport and metabolism                          | E               | 9.893E-01  | 1.896E-02    | 2.817E-02       |
| Amino acid transport and metabolism                          | F               | 5.993E-01  | 3.318E-02    | 6.481E-02       |
| Carbohydrate transport and metabolism                        | D               | 4.067E-01  | 9.481E-01    | 4.351E-02       |
| Carbohydrate transport and metabolism                        | S               | 1.965E-03  | 7.630E-01    | 5.086E-02       |
| Carbohydrate transport and metabolism                        | H               | 4.794E-02  | 2.889E-01    | 5.516E-02       |
| Carbohydrate transport and metabolism                        | N               | 8.776E-02  | 1.704E-01    | 5.736E-02       |
| Carbohydrate transport and metabolism                        | E               | 9.872E-01  | 1.481E-02    | 1.408E-02       |
| Carbohydrate transport and metabolism                        | F               | 5.012E-01  | 3.704E-02    | 4.630E-02       |
| Cell wall/membrane/envelope biogenesis                       | D               | 3.540E-01  | 9.516E-01    | 4.011E-02       |
| Cell wall/membrane/envelope biogenesis                       | S               | 3.268E-01  | 6.694E-01    | 4.099E-02       |
| Cell wall/membrane/envelope biogenesis                       | H               | 4.039E-03  | 3.306E-01    | 5.799E-02       |
| Cell wall/membrane/envelope biogenesis                       | N               | 7.358E-01  | 1.129E-01    | 3.491E-02       |
| Cell wall/membrane/envelope biogenesis                       | E               | 1.975E-01  | 6.452E-02    | 5.634E-02       |
| Cell wall/membrane/envelope biogenesis                       | F               | 4.262E-01  | 4.032E-02    | 4.630E-02       |
| Energy production and conversion                             | D               | 9.692E-02  | 9.688E-01    | 4.215E-02       |
| Energy production and conversion                             | S               | 4.674E-02  | 7.188E-01    | 4.543E-02       |
| Energy production and conversion                             | H               | 9.480E-01  | 1.719E-01    | 3.112E-02       |
| Energy production and conversion                             | N               | 2.763E-01  | 1.484E-01    | 4.738E-02       |
| Energy production and conversion                             | E               | 1.000E+00  | 0.000E+00    | 0.000E+00       |
| Energy production and conversion                             | F               | 4.538E-01  | 3.906E-02    | 4.630E-02       |
| Posttranslational modification, protein turnover, chaperones | D               | 9.594E-01  | 8.977E-01    | 2.685E-02       |
| Posttranslational modification, protein turnover, chaperones | S               | 5.366E-01  | 6.477E-01    | 2.815E-02       |
| Posttranslational modification, protein turnover, chaperones | H               | 1.759E-04  | 3.977E-01    | 4.950E-02       |
| Posttranslational modification, protein turnover, chaperones | N               | 8.123E-01  | 1.023E-01    | 2.244E-02       |
| Posttranslational modification, protein turnover, chaperones | E               | 2.889E-05  | 1.591E-01    | 9.859E-02       |
| Posttranslational modification, protein turnover, chaperones | F               | 8.150E-01  | 2.273E-02    | 1.852E-02       |
| Translation, ribosomal structure and biogenesis              | D               | 7.633E-04  | 9.932E-01    | 4.997E-02       |
| Translation, ribosomal structure and biogenesis              | S               | 3.946E-02  | 7.162E-01    | 5.235E-02       |
| Translation, ribosomal structure and biogenesis              | H               | 9.491E-07  | 3.986E-01    | 8.345E-02       |
| Translation, ribosomal structure and biogenesis              | N               | 9.979E-01  | 6.081E-02    | 2.244E-02       |
| Translation, ribosomal structure and biogenesis              | E               | 9.689E-01  | 2.027E-02    | 2.113E-02       |
| Translation, ribosomal structure and biogenesis              | F               | 1.000E+00  | 0.000E+00    | 0.000E+00       |

**Table S2:** Computed and measured growth rates by the optimal and generalist ME models.  $\Delta\mu$  and  $\%\Delta\mu$  denote absolute and percent change in growth rate, respectively. Rank denotes the rank of  $\Delta\mu$ , ordered from largest to smallest difference.

| Condition   | Optimal | Generalist | Measured | $\Delta\mu$ | $\%\Delta\mu$ | Rank |
|-------------|---------|------------|----------|-------------|---------------|------|
| Acetate     | 0.672   | 0.344      | 0.300    | -0.328      | -48.857       | 1    |
| Fructose    | 1.138   | 0.876      | 0.650    | -0.262      | -23.000       | 9    |
| Fumarate    | 1.020   | 0.581      | 0.420    | -0.439      | -43.014       | 3    |
| Galactose   | 1.025   | 0.760      | 0.260    | -0.265      | -25.821       | 6    |
| Glucosamine | 1.128   | 0.854      | 0.460    | -0.275      | -24.337       | 7    |
| Glucose     | 1.136   | 0.886      | 0.580    | -0.249      | -21.947       | 10   |
| Glycerol    | 1.141   | 0.821      | 0.470    | -0.320      | -28.011       | 4    |
| Mannose     | 1.115   | 0.848      | 0.470    | -0.267      | -23.951       | 8    |
| Pyruvate    | 1.008   | 0.950      | 0.400    | -0.058      | -5.773        | 11   |
| Succinate   | 1.056   | 0.601      | 0.440    | -0.454      | -43.042       | 2    |
| Xylose      | 1.018   | 0.734      | 0.550    | -0.284      | -27.912       | 5    |

**Table S3:** Mass fraction difference between computed efficient and measured proteomes.

| Growth rate ( $\text{h}^{-1}$ ) | Subsystem                  | Mass fraction (exp) | Mass fraction (optimal) | Percent difference (%) |
|---------------------------------|----------------------------|---------------------|-------------------------|------------------------|
| 0.120                           | Carbohydrate<br>Metabolism | 0.299               | 0.015                   | -95                    |
| 0.200                           | Carbohydrate<br>Metabolism | 0.276               | 0.024                   | -91                    |
| 0.350                           | Carbohydrate<br>Metabolism | 0.254               | 0.043                   | -83                    |
| 0.500                           | Carbohydrate<br>Metabolism | 0.208               | 0.061                   | -71                    |

**Table S4:** Significance of shifts in computed metabolic fluxes between optimal and generalist ME models, where p.wilcox is the  $p$ -value for the two-sided Wilcoxon rank-sum test, while p.greater and p.less are  $p$ -values for the Wilcoxon rank-sum test with alternative hypothesis that the optimal model has larger or smaller metabolic fluxes than the generalist model, respectively, and n is the number of fluxes in each subsystem excluding reactions having zero flux in both models.

| cond    | Supersystem                                          | p.wilcox  | p.greater | p.less    | n   |
|---------|------------------------------------------------------|-----------|-----------|-----------|-----|
| Glucose | Membrane Transport                                   | 4.802E-01 | 2.401E-01 | 7.603E-01 | 145 |
| Glucose | Lipid Metabolism                                     | 3.085E-09 | 1.542E-09 | 1.000E+00 | 86  |
| Glucose | Cell Wall/Membrane/Envelope Metabolism               | 5.663E-02 | 2.831E-02 | 9.719E-01 | 90  |
| Glucose | Nucleotide, Cofactor and Prosthetic Group Metabolism | 5.438E-03 | 2.719E-03 | 9.973E-01 | 273 |
| Glucose | AA and Carbohydrate Metabolism                       | 3.221E-02 | 1.610E-02 | 9.839E-01 | 536 |
| Glucose | Energy Production and Conversion                     | 2.055E-01 | 1.027E-01 | 8.990E-01 | 40  |
| Glucose | Other                                                | 5.615E-02 | 2.807E-02 | 9.721E-01 | 100 |
| Glucose | Inorganic Ion Transport and Metabolism               | 1.826E-01 | 9.132E-02 | 9.090E-01 | 114 |
| Acetate | Membrane Transport                                   | 9.063E-02 | 4.532E-02 | 9.548E-01 | 129 |
| Acetate | Lipid Metabolism                                     | 2.197E-13 | 1.099E-13 | 1.000E+00 | 86  |
| Acetate | Cell Wall/Membrane/Envelope Metabolism               | 7.333E-03 | 3.666E-03 | 9.964E-01 | 92  |
| Acetate | Nucleotide, Cofactor and Prosthetic Group Metabolism | 1.454E-04 | 7.270E-05 | 9.999E-01 | 264 |
| Acetate | AA and Carbohydrate Metabolism                       | 3.124E-05 | 1.562E-05 | 1.000E+00 | 515 |
| Acetate | Energy Production and Conversion                     | 3.322E-02 | 1.661E-02 | 9.839E-01 | 34  |
| Acetate | Other                                                | 1.648E-03 | 8.239E-04 | 9.992E-01 | 104 |
| Acetate | Inorganic Ion Transport and Metabolism               | 1.755E-02 | 8.773E-03 | 9.913E-01 | 108 |

## Supplementary Figures

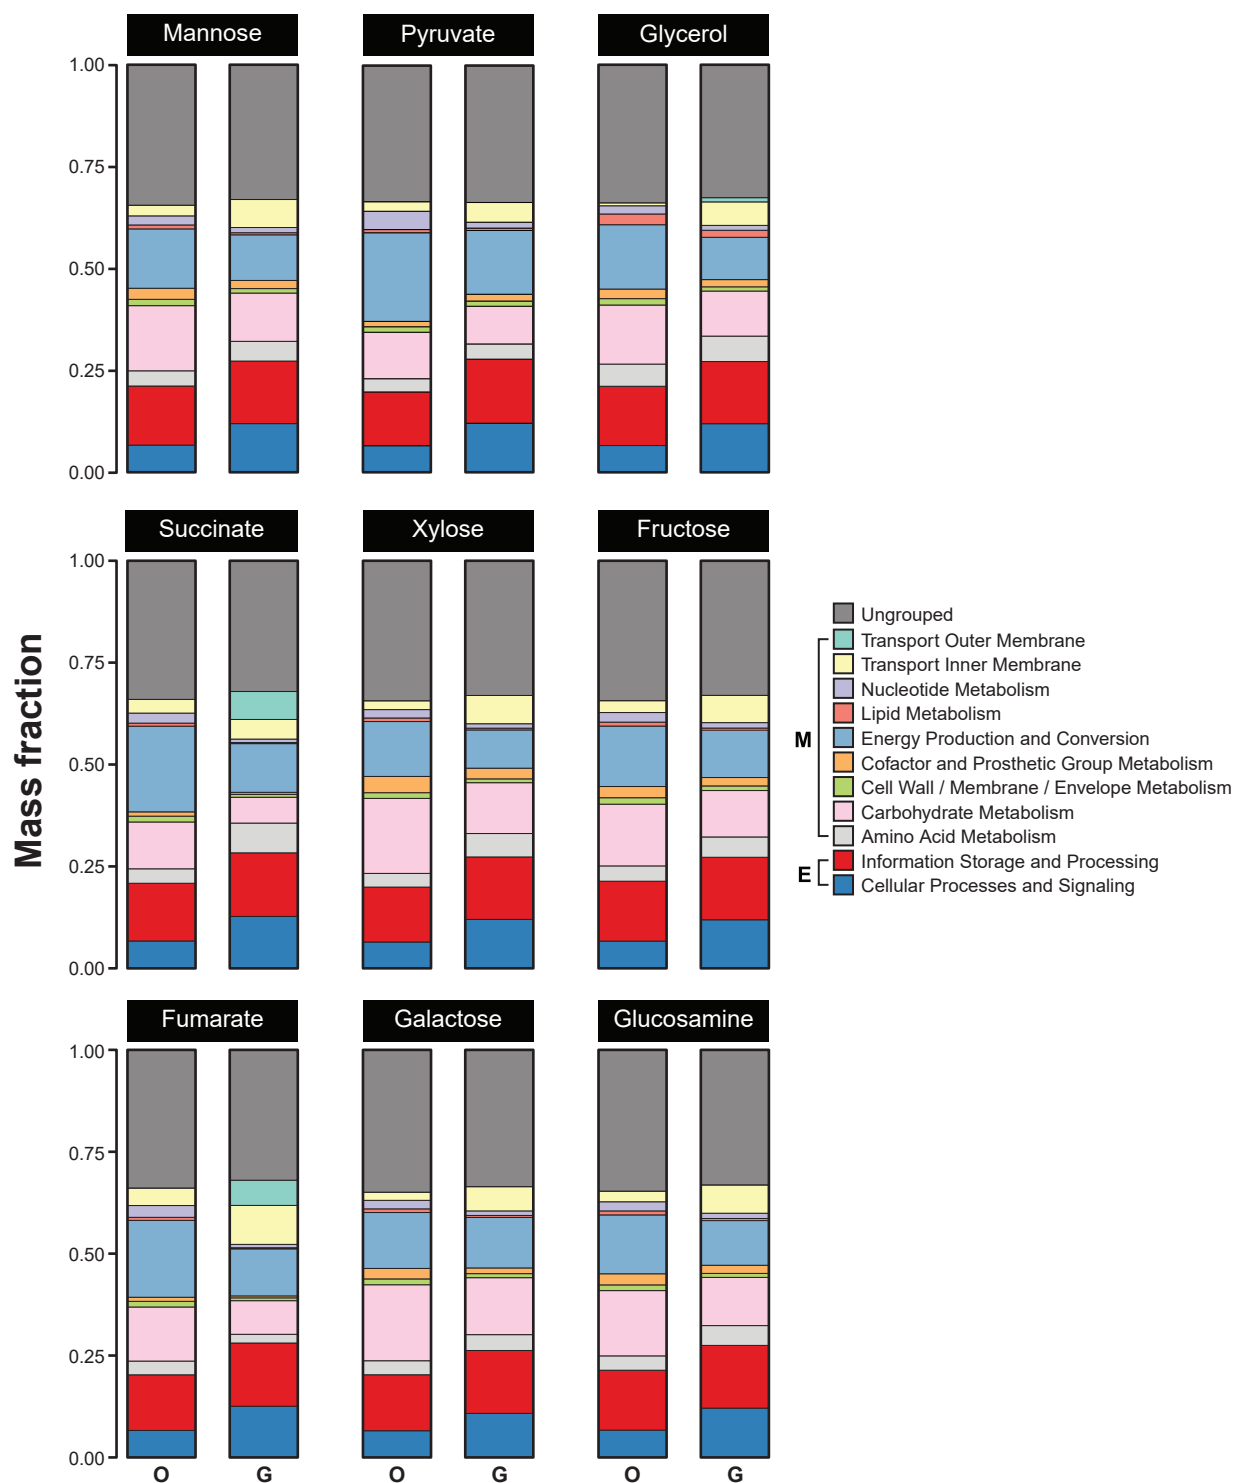

**Figure S1:** Global proteome allocation computed by optimal (O) and generalist (G) ME models for Metabolic (M) and Expression (E) systems in minimal media with different carbon sources.

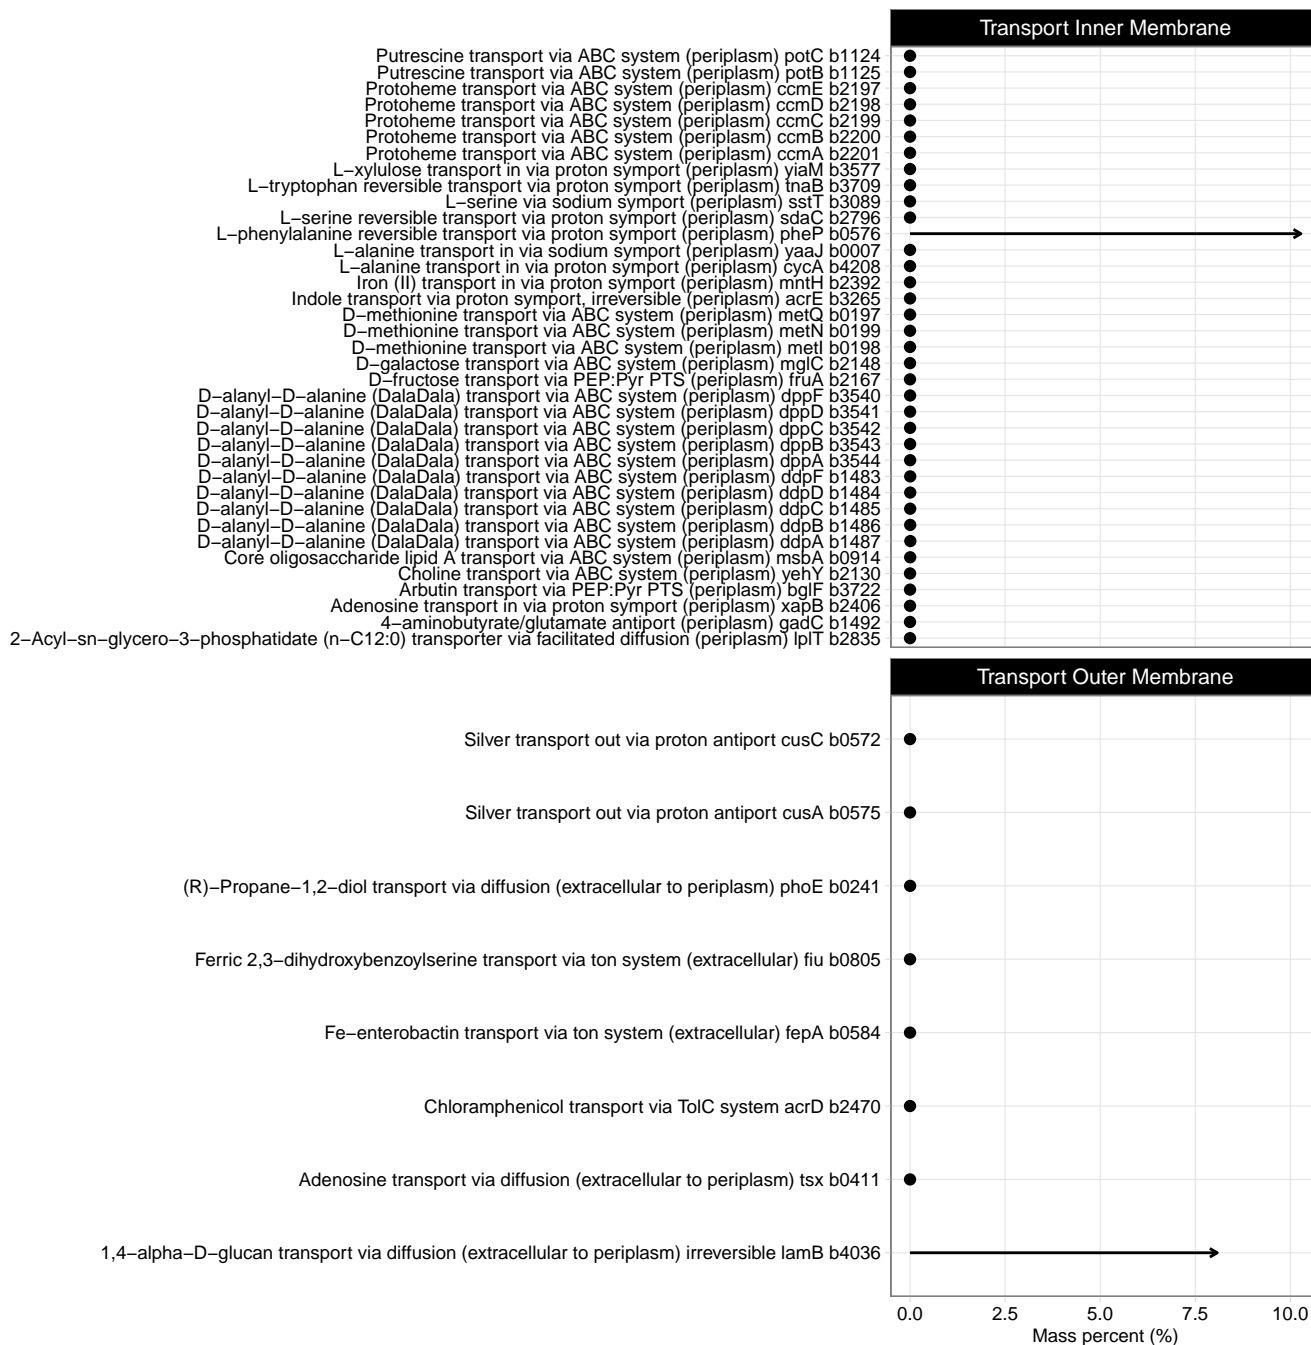

**Figure S2:** Shift in proteome allocation of membrane transport proteins. Arrows point from the mass fraction of each protein in the optimal ME model to that in the generalist ME model. Proteins with mass percent changes below 0.05% are shown as points.

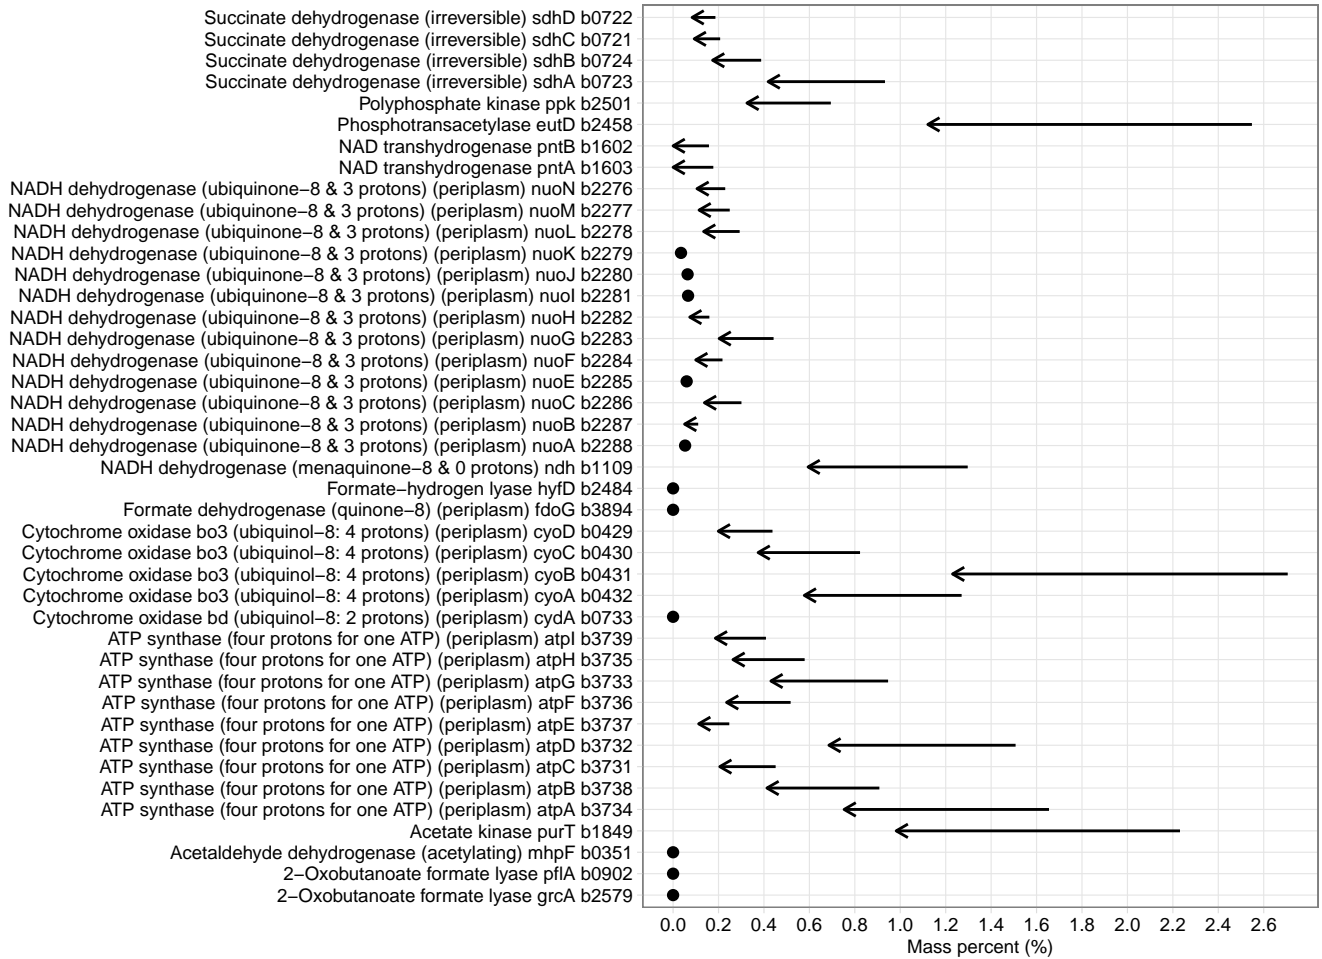

**Figure S3:** Shift in proteome allocation of proteins in the “energy production and conversion” sector. Arrows point from the mass fraction of each protein in the optimal model to that in the generalist ME model. Proteins with mass percent change below 0.05% are shown as points.

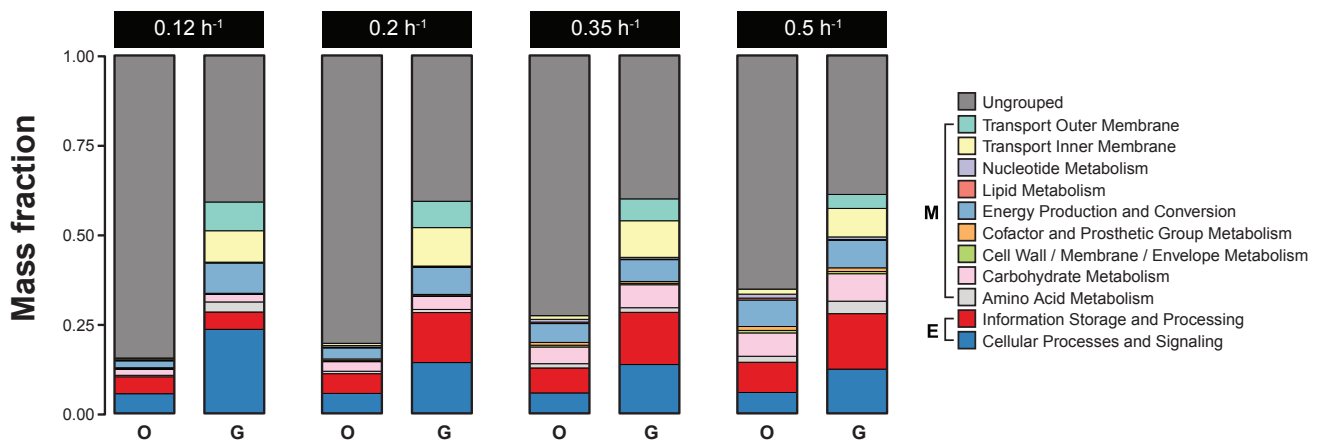

**Figure S4:** Global proteome allocation computed by optimal (O) and generalist (G) ME models for Metabolic (M) and Expression (E) systems in chemostat conditions with dilution rates ranging from  $0.12 \text{ h}^{-1}$  to  $0.5 \text{ h}^{-1}$ .

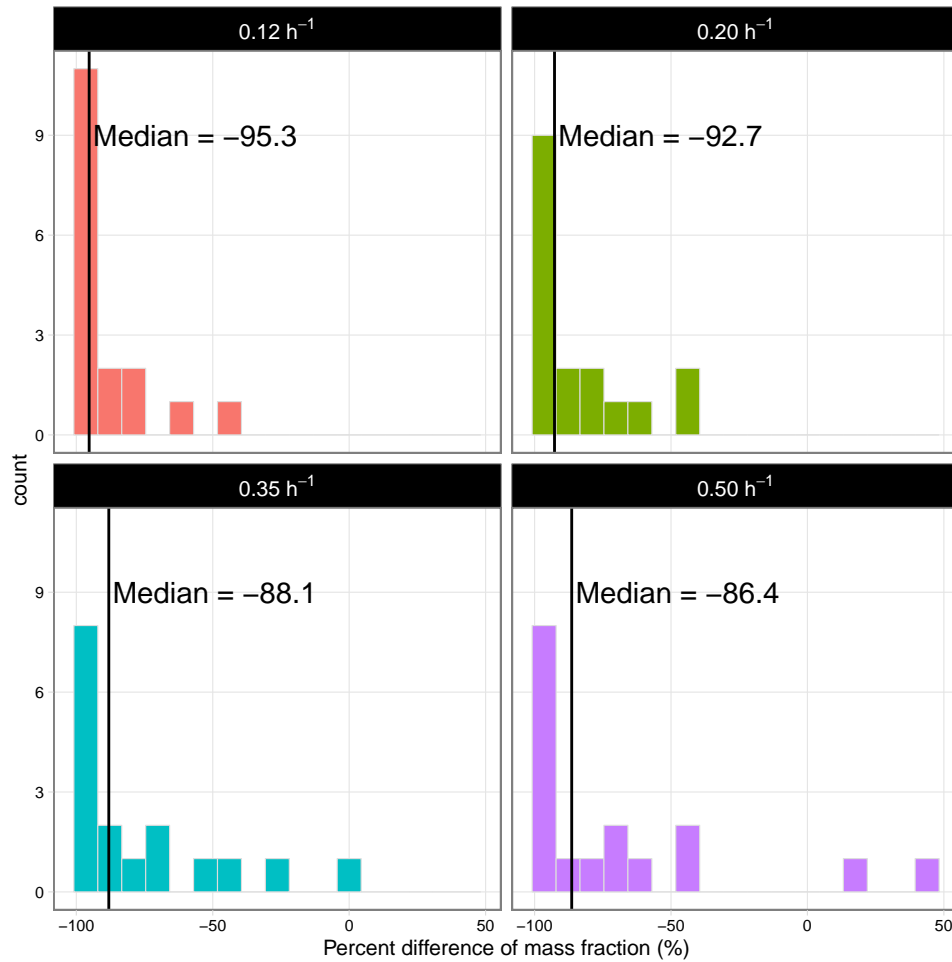

**Figure S5:** Histograms of protein mass fraction differences between measured proteins and those computed using the optimal ME model in chemostat conditions with dilution rates ranging from  $0.12 h^{-1}$  to  $0.5 h^{-1}$ . Mass fractions were compared at the level of metabolic and expression systems, as described in Fig. 1 of the main article.

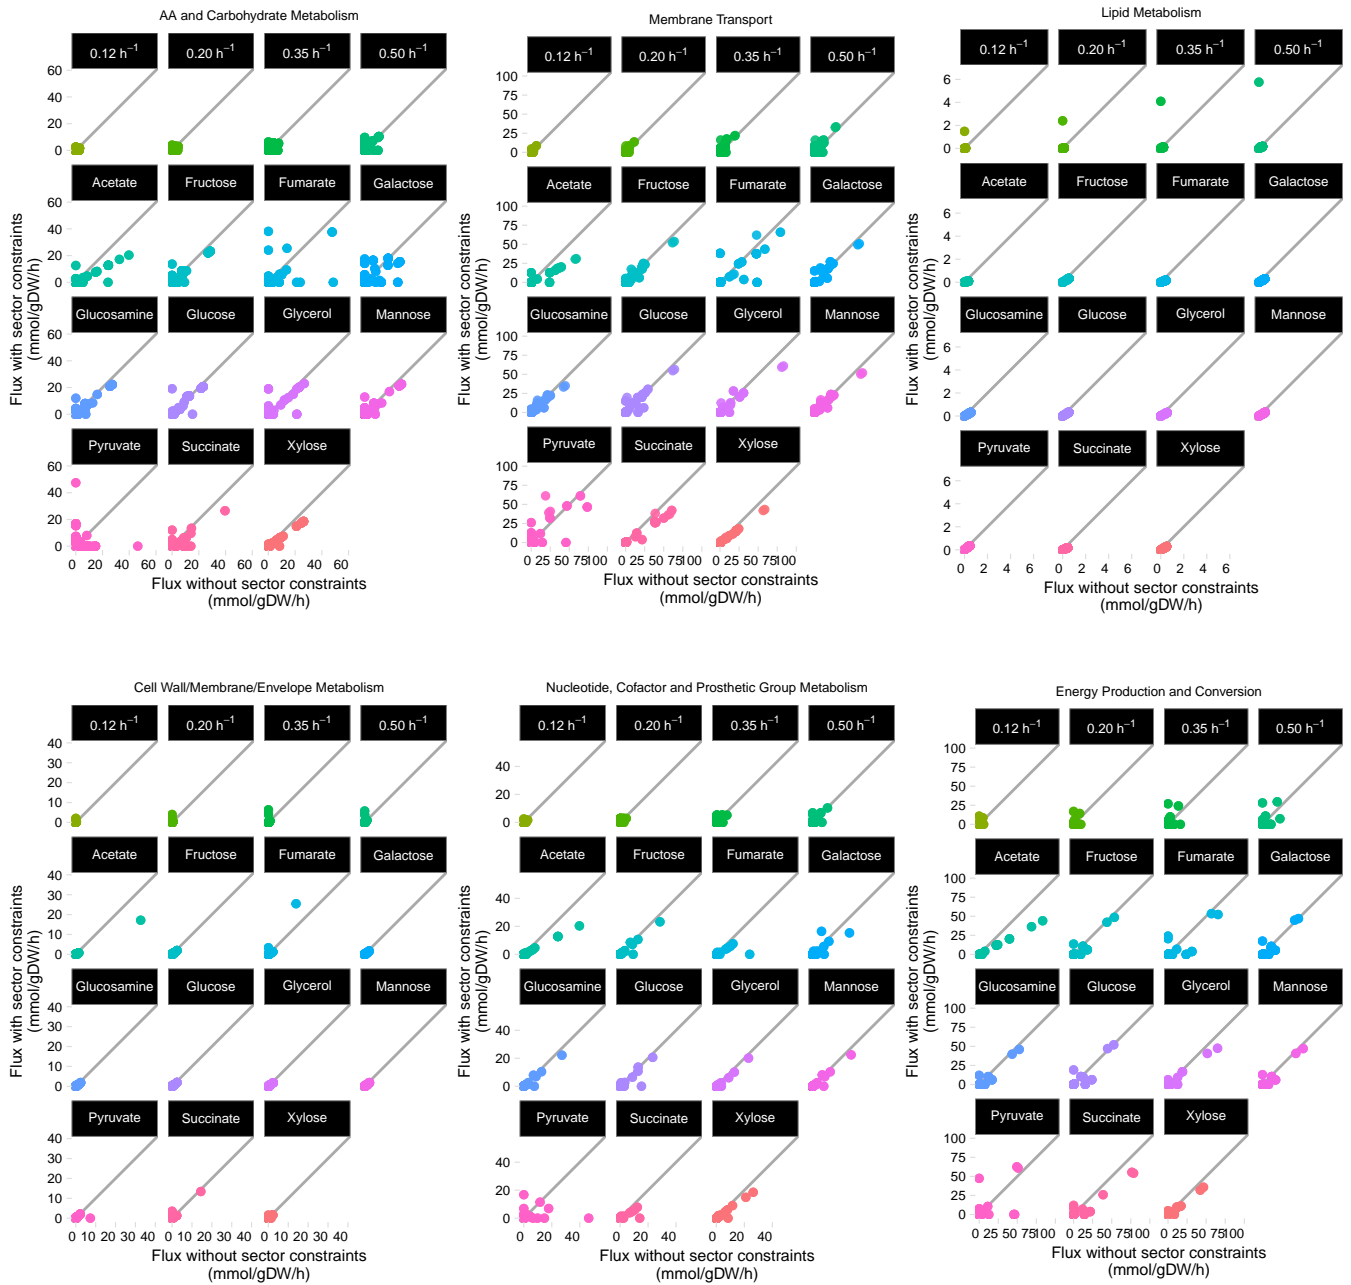

**Figure S6:** Metabolic flux shifts between optimal and generalist ME models in 15 minimal media conditions. Chemostat conditions are labeled with their corresponding dilution rates ranging from  $0.12 \text{ h}^{-1}$  to  $0.5 \text{ h}^{-1}$ .



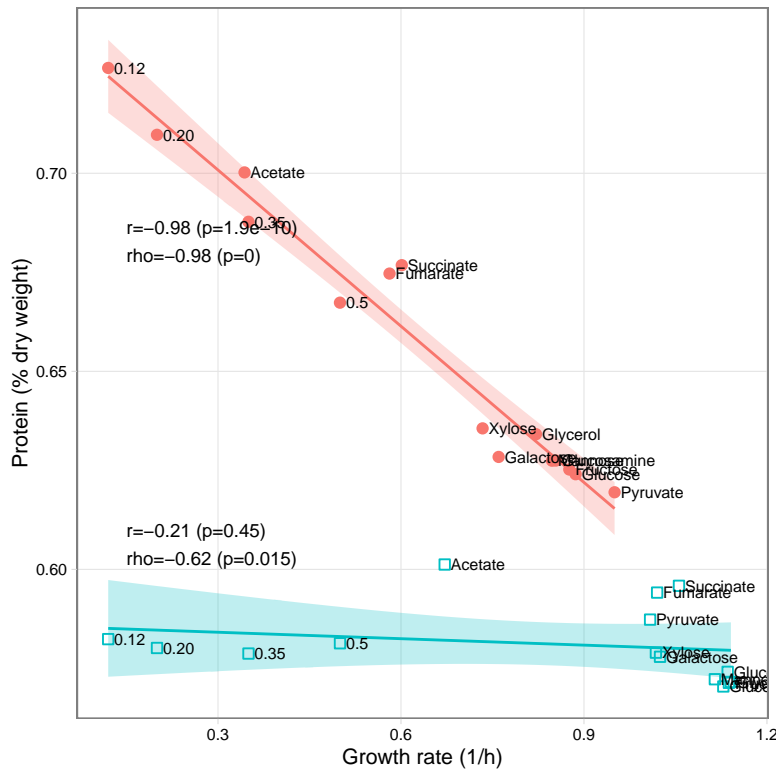

Figure S7: Computed protein size (% cell dry weight) versus computed growth rate. Blue squares: Optimal model. Red circles: Generalist model.

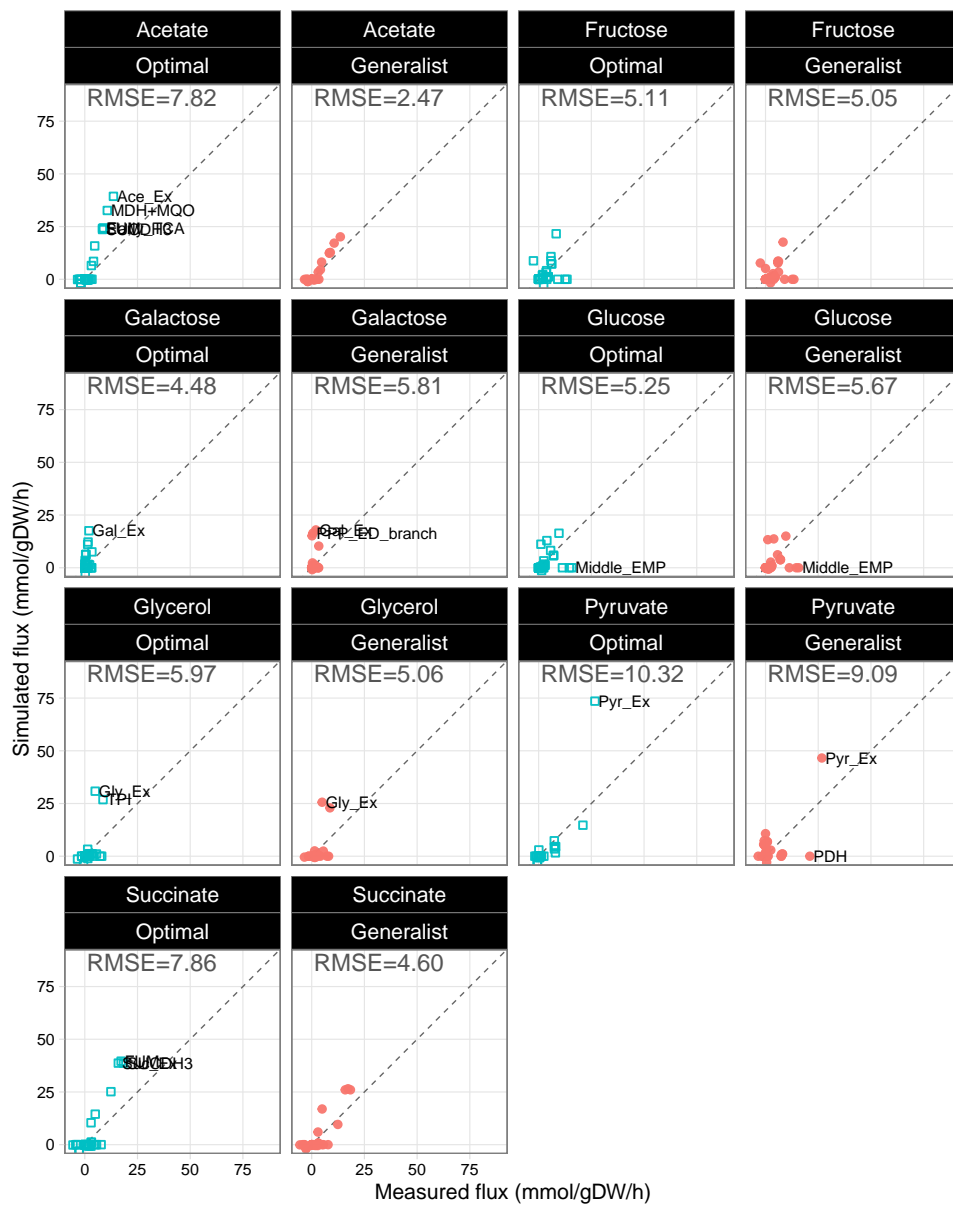

Figure S8: Comparison of computed fluxes with those determined using metabolic flux analysis by Gerosa et al.<sup>1</sup>

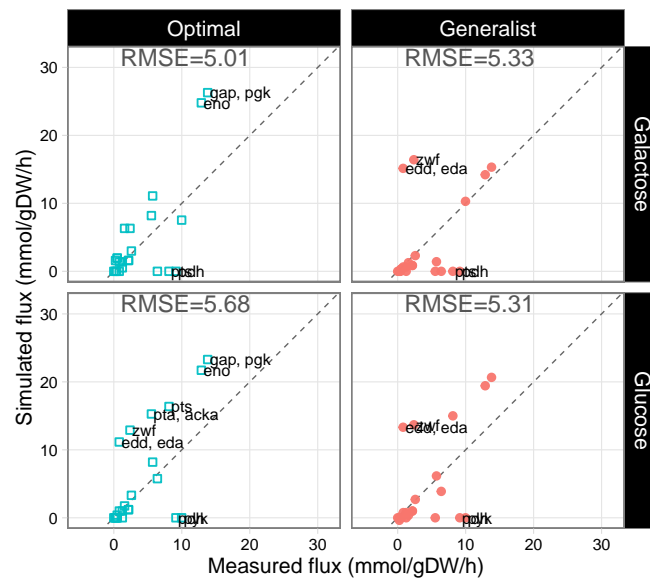

Figure S9: Comparison of computed fluxes with those determined using metabolic flux analysis by van Rijsewijk et al.<sup>2</sup>

## References

1. Luca Gerosa, Bart RB Haverkorn van Rijsewijk, Dimitris Christodoulou, Karl Kochanowski, Thomas SB Schmidt, Elad Noor, and Uwe Sauer. Pseudo-transition analysis identifies the key regulators of dynamic metabolic adaptations from steady-state data. *Cell Systems*, 1(4):270–282, 2015.
2. Bart RB Haverkorn van Rijsewijk, Annik Nanchen, Sophie Nallet, Roelco J Kleijn, and Uwe Sauer. Large-scale  $^{13}\text{C}$ -flux analysis reveals distinct transcriptional control of respiratory and fermentative metabolism in *Escherichia coli*. *Mol Syst Biol*, 7(1):477, 2011.
